# Supplementary material for: Increasing GLP-1–Induced β-Cell Proliferation by Silencing the Negative Regulators of Signaling cAMP Response Element Modulator-α and DUSP14
Source: Oxford University Press journal article supplement (doi:10.2337/db07-1414), 2007-11-20
Supplement: db071414onlineappendix.doc [file db071414onlineappendix.doc]

**SUPPLEMENTAL MATERIAL**

**Table S1: List of GLP-1-regulated genes in TC-Tet cells.**

| RefSeq / GenBank /  EntrezGene (EG) | Annotation | t = 0 (hr) | t = 45 (min) | t = 3 (hr) | t = 7 (hr) |
| --- | --- | --- | --- | --- | --- |
|  |  |  |  |  |  |
| **CLUSTER A** |  |  |  |  |  |
|  |  |  |  |  |  |
| NM_007498.2 | Activating transcription factor 3 | 0.12 | 2.94 | 1.73 | 0.65 |
| NM_153287.2 | AXIN1 up-regulated 1 | -0.42 | 3.45 | 2.27 | 0.85 |
| NM_007570.2 | B-cell translocation gene 2, anti-proliferative | 0.09 | 2.71 | 0.18 | -0.44 |
| NM_152810.1 | Cell division cycle 5-like (S. pombe) | -0.2 | 0.3 | 0.4 | -0.42 |
| AK010095.1 | Collagen, type XXII, alpha 1 | -0.62 | 0.43 | 0.17 | 0.49 |
| NM_007913.5 | Early growth response 1 | -0.54 | 2.3 | 0.16 | -0.9 |
| NM_007913.5 | Early growth response 1 | -0.25 | 2.58 | 0.48 | -0.59 |
| NM_133753.1 | ERBB receptor feedback inhibitor 1 | 0.05 | 1.62 | 1.66 | 0.47 |
|  | EST | -0.33 | 0.25 | 0.29 | -0.64 |
| NM_010234.2 | FBJ osteosarcoma oncogene | -0.19 | 3.2 | 0.89 | -0.42 |
| NM_010234.2 | FBJ osteosarcoma oncogene | -0.19 | 4.17 | 1.96 | 1.09 |
| NM_008037.3 | Fos-like antigen 2 | 0.03 | 4.75 | 4.55 | 1.73 |
| NM_007516.1 | Heterogeneous nuclear ribonucleoprotein D | -0.1 | 0.4 | 0.38 | 0.41 |
| NM_010495.1 | Inhibitor of DNA binding 1 | -0.08 | 2.09 | -0.03 | -0.36 |
| NM_008416.1 | Jun-B oncogene | 0.38 | 5.15 | 1.17 | 0.48 |
| NM_010637.1 | Kruppel-like factor 4 (gut) | -0.19 | 3.18 | 1.17 | 0.61 |
| NM_010637.1 | Kruppel-like factor 4 (gut) | -0.34 | 3.91 | 1.45 | 1.28 |
| NM_021565.1 | Midnolin | -0.6 | 2.3 | 1.77 | 0.95 |
| NM_011200.1 | Protein tyrosine phosphatase 4a1 | 0.16 | 1.48 | 1.26 | 0.77 |
| NM_009025.1 | RAS p21 protein activator 3 | -0.27 | 0.43 | -0.2 | 0.39 |
| NM_009061.2 | Regulator of G-protein signaling 2 | -0.01 | 3.04 | 1.37 | 1.07 |
| NM_009061.2 | Regulator of G-protein signaling 2 | 0.17 | 3.35 | 1.37 | 1.19 |
| NM_145955.2;  NM_178641.3 | RIKEN cDNA 1110007A13 gene;  Inositol polyphosphate-5-phosphatase F | -0.08 | 1.24 | 1.23 | 0.88 |
| NM_001039710.1 | RIKEN cDNA 1500041J02 gene | -0.14 | 1.7 | 1.4 | 0.38 |
| NM_001039710.1 | RIKEN cDNA 1500041J02 gene | -0.11 | 1.81 | 1.27 | 0.28 |
| NM_011386.2 | SKI-like | 0.29 | 1.5 | 0.45 | -0.32 |
| NM_178892.3 | TCDD-inducible poly(ADP-ribose) polymerase | 0.15 | 2.14 | 0.78 | 0.73 |
| NM_020507.3 | Transducer of ERBB2 | 0.11 | 2.09 | 0.39 | -0.44 |
| NM_144549.2 | Tribbles homolog 1 (Drosophila) | -0.11 | 1.4 | 1.52 | 1.06 |
| NM_019639.3 | Ubiquitin C | -0.39 | 0.18 | 0.22 | 0.08 |
|  |  |  |  |  |  |
| **CLUSTER B** |  |  |  |  |  |
|  |  |  |  |  |  |
| NM_018745.2 | Antizyme inhibitor 1 | -0.22 | 0.15 | 1.11 | 0.58 |
| NM_025936.1 | Arginyl-tRNA synthetase | -0.07 | -0.06 | 0.6 | 0.18 |
| NM_025313.1 | ATP synthase, H+ transporting, mitochondrial F1 complex, delta subunit | 0.03 | 0.66 | 1.6 | 1.11 |
| AK173107.1 | Atpase, class I, type 8B, member 2 | 0.08 | -0.25 | 1.03 | -0.03 |
| NM_013863.3 | Bcl2-associated athanogene 3 | 0.06 | 1 | 1.45 | 0.66 |
| 53414 (EG) | Bystin-like | -0.34 | 0.5 | 0.72 | 0.68 |
| NM_007594.2 | Calumenin | -0.15 | 0.12 | 0.91 | 0.67 |
| NM_013498.1 | CAMP responsive element modulator | 0.24 | 2.66 | 4.6 | 3.73 |
| NM_009974.2 | Casein kinase II, alpha 2, polypeptide | 0.19 | 0.1 | 1.48 | 0.47 |
| NM_026373.1 | CDK2-associated protein 2 | -0.2 | -0.25 | 0.85 | 0.24 |
| NM_134033.1 | CDNA sequence BC018601 | -0.08 | -1.1 | 0.32 | -0.39 |
| NM_174848.2;  NM_025910.2 | CDNA sequence BC043118;  Myc induced nuclear antigen | 0.08 | 0.09 | 1.7 | 1.23 |
| NM_001013391.1 | Cleavage and polyadenylation specific factor 6 | -0.27 | 0.26 | 1.64 | 0.07 |
| NM_007757.1 | Coproporphyrinogen oxidase | 0.27 | 0.36 | 1.45 | 0.35 |
| NM_007771.3 | Cryptochrome 1 (photolyase-like) | 0.04 | -0.03 | 0.73 | 0.32 |
| NM_009874.1 | Cyclin-dependent kinase 7 (homolog of Xenopus MO15 cdk-activating kinase) | 0.09 | -0.61 | 0.55 | 0.24 |
| NM_015761.1 | Downstream of Stk11 | 0.08 | 1.11 | 2.31 | 1.66 |
| 70601 (EG) | Ecdysoneless homolog (Drosophila) | 0.09 | -0.43 | 0.38 | 0.16 |
| 70601 (EG) | Ecdysoneless homolog (Drosophila) | -0.31 | -0.24 | 0.71 | 0.39 |
|  | EST | -0.15 | 1.94 | 2.23 | 2.03 |
|  | EST | -0.03 | 0.37 | 1.13 | 0.82 |
|  | EST | -0.52 | 0.15 | 1.26 | 0.55 |
| 13681 (EG) | Eukaryotic translation initiation factor 4A1 | 0.11 | 0.34 | 0.95 | 0.65 |
| AK075618.1 | Expressed sequence C79445 | -0.13 | 0.96 | 1.9 | 1.68 |
| NM_007991.2;  NM_054040.1 | Fibrillarin;  Tubby like protein 4 | -0.13 | 0.26 | 0.66 | 0.38 |
| NM_010225.1 | Forkhead box F2 | -0.7 | 0.05 | 1.07 | 0.73 |
| NM_173866.1 | Glutamic pyruvate transaminase (alanine aminotransferase) 2 | 0.09 | 0.27 | 1.44 | 0.41 |
| NM_153547.2 | Guanine nucleotide binding protein-like 3 (nucleolar) | 0.41 | 0.01 | 0.71 | 0.32 |
| NM_008300.2 | Heat shock protein 4 | -0.13 | 0.21 | 0.83 | 0.34 |
| NM_133662.1 | Immediate early response 3 | -0.08 | 1.19 | 2.67 | 1.94 |
| NM_133662.1 | Immediate early response 3 | -0.12 | 1.65 | 2.67 | 1.87 |
| NM_054102.2 | Influenza virus NS1A binding protein | -0.42 | 0.29 | 1.8 | 0.62 |
| NM_146035.1 | Mannoside acetylglucosaminyltransferase 2 | 0.04 | 0.12 | 1.19 | 0.9 |
| NM_134094.2 | Neurocalcin delta | 0.16 | 0.28 | 1.59 | 0.44 |
| NM_153057.2 | Nodal modulator 1 | -0.15 | -0.22 | 0.4 | -0.28 |
| NM_018868.1 | Nucleolar protein 5 | 0.01 | 0.3 | 1.36 | 0.43 |
| AK029961.1 | Nucleolar protein 8 | 0.31 | -0.3 | 0.49 | 0.01 |
| NM_013614.1 | Ornithine decarboxylase, structural 1 | 0.06 | 0.68 | 1.03 | 0.84 |
| NM_013614.1 | Ornithine decarboxylase, structural 1 | 0.04 | 0.55 | 1.1 | 0.67 |
| NM_008904.1 | Peroxisome proliferative activated receptor, gamma, coactivator 1 alpha | 0.23 | -0.21 | 1.83 | 0.81 |
| NM_172303.3 | PHD finger protein 17 | 0.12 | 0.33 | 1.02 | 0.28 |
| NM_011085.2 | Phosphatidylinositol 3-kinase, regulatory subunit, polypeptide 1 (p85 alpha) | -0.01 | 0.76 | 1.96 | 1.25 |
| NM_011085.2 | Phosphatidylinositol 3-kinase, regulatory subunit, polypeptide 1 (p85 alpha) | 0.14 | -0.22 | 1.25 | 0.2 |
| NM_011050.1 | Programmed cell death 4 | -0.31 | 0.4 | 1.34 | 0.52 |
| NM_011045.1 | Proliferating cell nuclear antigen | 0.15 | 0.59 | 1.51 | 0.76 |
| NM_013636.2 | Protein phosphatase 1, catalytic subunit, gamma isoform | -0.02 | 0.35 | 1.05 | 0.7 |
| NM_023126.2 | RAB8A, member RAS oncogene family | -0.01 | 0.04 | 0.67 | 0.39 |
| NM_019958.1 | Regulator of G-protein signaling 17 | 0.4 | -0.55 | 2.45 | 1.7 |
| NM_025846.1 | Related RAS viral (r-ras) oncogene homolog 2 | -0.17 | -0.37 | 0.8 | 0.47 |
| NM_011284.2 | Replication protein A2 | -0.36 | -0.29 | 0.47 | -0.53 |
| NM_028658.2 | RIKEN cDNA 1110018J12 gene | -0.35 | -0.2 | 1.4 | 0.55 |
| NM_026890.1 | RIKEN cDNA 1500001L15 gene | 0.08 | -0.12 | 1.02 | 0.1 |
| 72520 (EG) | RIKEN cDNA 2610305J24 gene | 0.19 | 0.99 | 2.31 | 1.94 |
| NM_178115.3 | RIKEN cDNA 2700050L05 gene | 0.1 | -0.46 | 0.8 | 0.39 |
| NM_172884.1 | RIKEN cDNA 2900026A02 gene | 0.21 | 0.56 | 1.67 | 0.55 |
| NM_001025373.1 | RIKEN cDNA 4930432O21 gene | 0.03 | 0.94 | 3 | 1.76 |
| NM_172738.1 | RIKEN cDNA 5730403M16 gene | 0.27 | -0.21 | 1.01 | 0.25 |
| NM_145355.2 | Ring finger protein 185 | 0.38 | -0.03 | 1.02 | -0.07 |
| NM_011358.1 | Splicing factor, arginine/serine-rich 2 (SC-35) | -0.21 | -0.02 | 0.72 | 0.4 |
| NM_011358.1 | Splicing factor, arginine/serine-rich 2 (SC-35) | 0.07 | 0.08 | 1.08 | 0.24 |
| NM_013663.3 | Splicing factor, arginine/serine-rich 3 (SRp20) | 0.04 | 0.08 | 0.74 | -0.33 |
| NM_013663.3 | Splicing factor, arginine/serine-rich 3 (SRp20) | 0.08 | 0.3 | 0.84 | -0.19 |
| NM_013663.3 | Splicing factor, arginine/serine-rich 3 (SRp20) | 0.1 | 0.22 | 0.89 | -0.24 |
| NM_146083.1 | Splicing factor, arginine/serine-rich 7 | 0 | 0.03 | 0.75 | -0.26 |
| NM_146083.1 | Splicing factor, arginine/serine-rich 7 | -0.1 | -0.16 | 0.9 | -0.2 |
| NM_029457.2 | SUMO/sentrin specific peptidase 2 | -0.28 | -0.13 | 0.73 | 0.32 |
| NM_019571.1 | Tetraspanin 5 | -0.14 | 0.3 | 0.6 | 0.18 |
| NM_019571.1 | Tetraspanin 5 | -0.12 | 0.34 | 1.09 | 0.36 |
| NM_029571.1 | Thioredoxin domain containing 12 (endoplasmic reticulum) | 0.08 | -0.24 | 0.7 | 0.22 |
| BX637742.1 | Transcribed locus, moderately similar to XP_574723.1  PREDICTED: similar to LRRGT00097 | -0.05 | 0.36 | 1.1 | 0.92 |
| NM_144554.1 | Tribbles homolog 3 (Drosophila) | 0.03 | 0.77 | 1.7 | 0.52 |
| NM_009466.2 | UDP-glucose dehydrogenase | -0.16 | -0.49 | 0.83 | 0.42 |
| NM_023311.3 | Yip1 domain family, member 5 | -0.02 | 0.1 | 0.55 | 0.23 |
| NM_009561.1 | Zinc finger protein 61 | -0.37 | 0 | 0.87 | 0.26 |
|  |  |  |  |  |  |
| **CLUSTER C** |  |  |  |  |  |
|  |  |  |  |  |  |
| NM_026004.1 | 5'-nucleotidase, cytosolic III | -0.07 | 0.19 | 0.47 | 0.54 |
| NM_007404.1 | A disintegrin and metallopeptidase domain 9 (meltrin gamma) | 0.02 | 0.03 | 1.4 | 1.24 |
| NM_027976.2 | Acyl-CoA synthetase long-chain family member 5 | 0.11 | 0.15 | 0.21 | 1.08 |
| NM_001039515.1 | ADP-ribosylation factor-like 4A | 0.55 | -0.57 | 0.27 | 0.09 |
| BC028270.1 | AP2 associated kinase 1 | 0.1 | 0.16 | 0.92 | 0.96 |
| NM_013854.1 | ATP-binding cassette, sub-family F (GCN20), member 1 | -0.13 | 0.09 | 0.33 | 0.48 |
| NM_016916.3 | Bladder cancer associated protein homolog (human) | 0.15 | 0.01 | 0.31 | 0.5 |
| AJ276309.1 | Braf transforming gene | -0.19 | -0.08 | 0.69 | 0.97 |
| NM_001024468.1 | Branched chain aminotransferase 1, cytosolic | 0.19 | 0.11 | 0.62 | 0.88 |
| NM_009846.2 | CD24a antigen | 0.43 | 0.19 | 1.04 | 1.56 |
| NM_009846.2 | CD24a antigen | 0.3 | 0.17 | 0.99 | 1.55 |
| NM_139291.2 | Cell division cycle 26 | -0.08 | 0.07 | 1.14 | 0.88 |
| NM_007638.2 | Chaperonin subunit 7 (eta) | 0.07 | 0.06 | 0.46 | 0.67 |
| NM_007638.2 | Chaperonin subunit 7 (eta) | -0.02 | -0.12 | 0.24 | 0.61 |
| NM_019660.2 | C-myc binding protein | -0.14 | -0.12 | 0.07 | 0.62 |
| NM_139117.2 | Cold shock domain protein A | -0.15 | -0.14 | 0.59 | 0.88 |
| NM_025611.5 | Cullin 7 | 0.15 | 0.02 | -0.15 | 0.63 |
| 13063 (EG) | Cytochrome c, somatic | -0.25 | -0.07 | 0.55 | 0.75 |
| 13063 (EG) | Cytochrome c, somatic | -0.1 | -0.12 | 0.51 | 0.81 |
| NM_197982.2 | DEAD (Asp-Glu-Ala-Asp) box polypeptide 39 | 0.24 | -0.29 | 0.86 | 0.63 |
| NM_001033420.1 | Dedicator of cyto-kinesis 1 | -0.17 | -0.05 | 0.78 | 0.89 |
| NM_198937.1 | DNA segment, Chr 17, ERATO Doi 441, expressed | -0.16 | -0.11 | 0.63 | 0.78 |
| NM_008298.2 | DnaJ (Hsp40) homolog, subfamily A, member 1 | -0.18 | -0.19 | 0.48 | 0.42 |
| NM_026400.2 | DnaJ (Hsp40) homolog, subfamily B, member 11 | -0.28 | -0.14 | 0.62 | 0.96 |
| NM_008929.2 | DnaJ (Hsp40) homolog, subfamily C, member 3 | -0.07 | 0.1 | 0.79 | 1.15 |
| NM_008929.2 | DnaJ (Hsp40) homolog, subfamily C, member 3 | -0.32 | -0.23 | 0.38 | 0.87 |
| NM_019819.2 | Dual specificity phosphatase 14 | -0.01 | 0.22 | 1.6 | 1.72 |
| 70601 (EG) | Ecdysoneless homolog (Drosophila) | -0.04 | 0.11 | 0.96 | 0.88 |
| NM_207685.1 | ELAV (embryonic lethal, abnormal vision, Drosophila)-like 2 (Hu antigen B) | 0.01 | 0.1 | -0.4 | 1.12 |
| BC006925.1 | Elongation factor RNA polymerase II 2 | -0.26 | 0.2 | 0.96 | 1.23 |
|  | EST | 0.24 | 0.27 | 1.49 | 1.29 |
|  | EST | 0.12 | 1.02 | 1.67 | 1.83 |
|  | EST | -1.11 | 0.11 | 0.12 | 0.6 |
|  | EST | 0.38 | 0.66 | 1.14 | 1.27 |
|  | EST | -0.12 | 0.12 | 0.99 | 1.31 |
|  | EST | 0.17 | -0.12 | 1.89 | 2.18 |
|  | EST | 0.17 | 0.28 | 0.46 | 1.08 |
|  | EST | -0.21 | 0.06 | 1.02 | 0.9 |
| NM_144958.2 | Eukaryotic translation initiation factor 4A1 | 0 | 0.32 | 0.85 | 0.73 |
| NM_019395.1 | Fructose bisphosphatase 1 | 0.1 | 0.31 | 2.51 | 3.39 |
| NM_007994.1 | Fructose bisphosphatase 2 | -0.14 | -0.07 | 1.8 | 2.55 |
| NM_025310.2 | FtsJ homolog 3 (E. coli) | 0.03 | 0.02 | 0.85 | 0.93 |
| NM_010269.1 | Ganglioside-induced differentiation-associated-protein 2 | -0.13 | 0.18 | 1.13 | 1.03 |
| NM_146041.1 | GDP-mannose 4, 6-dehydratase | 0.08 | 0.11 | -0.25 | 1.22 |
| NM_019425.1 | Glucosamine-phosphate N-acetyltransferase 1 | -0.05 | 0.12 | 1.06 | 0.87 |
| NM_008062.2 | Glucose-6-phosphate dehydrogenase X-linked | -0.08 | 0.18 | 0.44 | 0.77 |
| NM_175380.3 | Glycerol-3-phosphate dehydrogenase 1-like | 0.09 | 0.11 | 0.25 | 0.82 |
| NM_207000.1 | H2A histone family, member Y2 | -0.31 | -0.16 | 1.1 | 1.6 |
| NM_022310.2 | Heat shock 70kD protein 5 (glucose-regulated protein) | -0.55 | -0.15 | 0.73 | 1.09 |
| 15510 (EG) | Heat shock protein 1 (chaperonin) | -0.18 | -0.04 | -0.06 | 0.27 |
| NM_010480.3 | Heat shock protein 90kDa alpha (cytosolic), class A member 1 | -0.14 | -0.15 | 0.2 | 0.5 |
| NM_008302.2 | Heat shock protein 90kDa alpha (cytosolic), class B member 1 | -0.08 | -0.03 | 0.38 | 0.6 |
| NM_008214.2 | Histidyl-tRNA synthetase | 0.01 | 0.17 | 0.89 | 1.17 |
| NM_177766.2 | Hypothetical protein 6030458H05 | 0.03 | 0.25 | 0.99 | 0.94 |
| NM_010748.1 | Lysosomal trafficking regulator | -0.18 | -0.01 | 0.55 | 1.12 |
| NM_008618.2 | Malate dehydrogenase 1, NAD (soluble) | -0.18 | -0.26 | 0.42 | 0.77 |
| NM_011900.2 | Mannose-P-dolichol utilization defect 1 | -0.17 | -0.38 | 0.72 | 0.83 |
| 66493 (EG) | Mitochondrial ribosomal protein L51 | 0.04 | -0.14 | 0.62 | 0.55 |
| NM_025901.2 | Polymerase (RNA) III (DNA directed) polypeptide K | -0.14 | -0.19 | 0.4 | 0.61 |
| NM_025861.1 | PQ loop repeat containing 1 | 0.03 | 0.23 | 0.84 | 0.86 |
| NM_008945.1 | Proteasome (prosome, macropain) subunit, beta type 4 | -0.19 | -0.14 | 0.2 | 0.52 |
| NM_011186.1 | Proteasome (prosome, macropain) subunit, beta type 5 | -0.02 | -0.14 | 0.1 | 0.41 |
| NM_008946.2 | Proteasome (prosome, macropain) subunit, beta type 6 | 0.03 | -0.02 | 0.15 | 0.51 |
| NM_009787.2 | Protein disulfide isomerase associated 4 | -0.04 | 0.13 | 1 | 1.6 |
| NM_008014.2 | Protein phosphatase 1G (formerly 2C), magnesium-dependent, gamma isoform | -0.08 | 0.09 | 0.27 | 0.41 |
| NM_019755.2 | Proteolipid protein 2 | -0.74 | -0.02 | 0.63 | 0.92 |
| NM_011239.1 | RAN binding protein 1 | -0.32 | -0.36 | -0.04 | 0.61 |
| NM_024457.1 | RAS related protein 1b | -0.11 | 0.09 | 0.73 | 0.64 |
| NM_009031.2 | Retinoblastoma binding protein 7 | 0.02 | -0.03 | -0.25 | 0.27 |
| NM_013762.1 | Ribosomal protein L3 | -0.22 | 0.02 | 0.35 | 0.46 |
| 81910 (EG) | Ribosome binding protein 1 | -0.25 | -0.15 | -0.06 | 0.6 |
| NM_009836.1 | RIKEN cDNA 0610031J06 gene | 0.23 | 0.14 | 0.9 | 0.82 |
| NM_009836.1 | RIKEN cDNA 0610031J06 gene | 0.05 | 0.23 | 0.61 | 0.87 |
| NM_019769.2 | RIKEN cDNA 1500003O03 gene | -0.04 | 0.05 | 0.65 | 1.03 |
| NM_173366.1; NM_198102.1 | RIKEN cDNA 1500010G04 gene;  RIKEN cDNA G430041M01 gene | -0.17 | 0.42 | 1.24 | 1.1 |
| AK079015.1 | RIKEN cDNA 1700041C02 gene | -0.2 | -0.04 | 1.27 | 2.1 |
| NM_001040399.1 | RIKEN cDNA 1700108L22 gene | 0.12 | 0.16 | 0.64 | 0.99 |
| NM_001033165.1 | RIKEN cDNA 2010203O07 gene | -0.37 | -0.24 | 0.68 | 0.73 |
| NM_028469.1 | RIKEN cDNA 3110082I17 gene | 0.12 | 0.09 | 0.78 | 0.82 |
| NM_146047.1 | RIKEN cDNA C130052I12 gene | 0 | -0.08 | 0.43 | 0.52 |
| NM_023270.3 | Ring finger protein 128 | 0.23 | 0.31 | 1.07 | 1.54 |
| NM_023270.3 | Ring finger protein 128 | 0.05 | 0.02 | 0.97 | 1.36 |
| NM_001029982.1 | Sec23 interacting protein | -0.1 | -0.21 | 0.36 | 0.32 |
| NM_009254.2 | Serine (or cysteine) peptidase inhibitor, clade B, member 6a | 0.08 | 0.51 | 1.07 | 1.68 |
| NM_148942.1 | Serine (or cysteine) peptidase inhibitor, clade B, member 6c | 0.08 | 0.5 | 1.27 | 1.37 |
| 626832;  665078 | Similar to gonadotropin inducible ovarian transcription factor 1;  Similar to zinc finger protein 709 | 0.55 | -0.2 | 0.21 | 0.47 |
| 666231 (EG) | Similar to Ornithine decarboxylase (ODC) | -0.17 | 0.35 | 0.65 | 0.77 |
| 667885 (EG) | Similar to zinc finger protein 709 | 0.28 | 0.56 | 1.42 | 1.46 |
| NM_021336.3 | Small nuclear ribonucleoprotein polypeptide A' | -0.23 | 0.06 | 0.22 | 0.85 |
| NM_080470.1 | SMC (structural maintenace of chromosomes 1)-like 2 (S. cerevisiae) | -0.13 | -0.15 | 0.96 | 1.4 |
| NM_011400.1 | Solute carrier family 2 (facilitated glucose transporter), member 1 | -0.52 | -0.09 | 0.88 | 1.29 |
| NM_019796.3 | Synaptotagmin binding, cytoplasmic RNA interacting protein | -0.23 | 0.09 | 0.59 | 0.64 |
| NM_009311.1 | Tachykinin 1 | -0.16 | 0.31 | 1.78 | 1.87 |
| BC063101.1 | Tankyrase, TRF1-interacting ankyrin-related ADP-ribose polymerase 2 | 0.03 | -0.02 | 0.44 | 0.4 |
|  | Transcribed locus | -0.18 | -0.27 | 0.22 | 1.21 |
| NM_178598.1 | Transgelin 2 | 0.25 | 0.49 | 1.58 | 1.35 |
| NM_026211.1 | Transmembrane emp24 protein transport domain containing 9 | -0.08 | -0.16 | 0.31 | 0.48 |
| NM_198421.1 | Trf (TATA binding protein-related factor)-proximal protein homolog (Drosophila) | -0.22 | -0.5 | 0.08 | 0.09 |
| NM_011710.2 | Tryptophanyl-tRNA synthetase | 0.35 | -0.12 | 0.74 | 1.27 |
| NM_011654.1 | Tubulin, alpha 2 | -0.28 | -0.21 | 0.29 | 1.15 |
| NM_023716.1 | Tubulin, beta 2b | -0.12 | 0.82 | 1.12 | 1.62 |
| NM_146116.1 | Tubulin, beta 2c | 0.28 | 0.33 | 0.76 | 1.11 |
| NM_146116.1 | Tubulin, beta 2c | 0.29 | 0.16 | 0.8 | 1.07 |
| NM_146116.1 | Tubulin, beta 2c | 0.19 | 0.27 | 0.73 | 1.21 |
| NM_011655.2 | Tubulin, beta 5 | 0 | 0.02 | 0.71 | 0.98 |
| 22154 (EG) | Tubulin, beta 5 | -0.17 | 0.09 | 0.62 | 1.07 |
| NM_011655.2 | Tubulin, beta 5 | -0.03 | -0.03 | 0.79 | 1.38 |
| NM_011655.2 | Tubulin, beta 5 | -0.47 | -0.13 | 0.58 | 1.34 |
| NM_026473.2 | Tubulin, beta 6 | 0.05 | 0.34 | 1.41 | 1.54 |
| NM_025407.2 | Ubiquinol-cytochrome c reductase core protein 1 | -0.01 | -0.05 | 0.42 | 0.37 |
| NM_019562.1 | Ubiquitin carboxyl-terminal esterase L5 | 0.04 | 0.16 | 0.4 | 0.99 |
| NM_009510.2 | Villin 2 | -0.77 | 0.09 | 0.53 | 0.85 |
| NM_009510.2;  NM_183367.1 | Villin 2;  Synaptotagmin-like 3 | -0.13 | -0.18 | -0.21 | 0.84 |
| 212198 (EG) | WD repeat domain 25 | 0.01 | 0.33 | 1.89 | 1.73 |
| NM_178363.2 | YLP motif containing 1 | -0.75 | 0.01 | 0.21 | 0.46 |
| NM_009549.2 | Zinc finger protein 185 | -0.36 | 0.05 | 0.71 | 1.79 |
| NM_153160.2 | Zinc finger, CCHC domain containing 17 | -0.09 | 0.01 | 0.82 | 0.76 |
| BC040468.1 | Zinc finger, UBR1 type 1 | 0.07 | 0.03 | 1.29 | 1.3 |
|  |  |  |  |  |  |
| **CLUSTER D** |  |  |  |  |  |
|  |  |  |  |  |  |
| NM_053272.1 | 24-dehydrocholesterol reductase | 0.31 | 0.24 | -1.17 | -1.11 |
| NM_008255.1 | 3-hydroxy-3-methylglutaryl-Coenzyme A reductase | 0.1 | 0.38 | -0.67 | -0.77 |
| NM_145942.2 | 3-hydroxy-3-methylglutaryl-Coenzyme A synthase 1 | 0.38 | 0.07 | -0.51 | -0.66 |
| NM_133232.2 | 6-phosphofructo-2-kinase/fructose-2,6-biphosphatase 3 | -0.05 | -0.36 | -1.39 | -1.27 |
| NM_181406.2 | Arginyl-tRNA synthetase-like | 0.11 | 0.01 | -0.4 | -0.33 |
| NM_015804.1 | ATPase, class VI, type 11A | 0.02 | 0.07 | -0.76 | -0.72 |
| NM_009760.2 | BCL2/adenovirus E1B interacting protein 1, NIP3 | 0.04 | 0.04 | -0.74 | -0.99 |
| NM_007664.2 | Cadherin 2 | -0.27 | -0.17 | -1.07 | -1.13 |
| AK122383.1 | Calmodulin binding transcription activator 1 | -0.04 | 0.37 | -0.57 | -0.9 |
| NM_023733.2 | Carnitine O-octanoyltransferase | 0.24 | 0.23 | -1.01 | -0.03 |
| NM_019922.1 | Cartilage associated protein | 0.24 | -0.22 | -0.84 | -1.26 |
| NM_146087.1 | Casein kinase 1, alpha 1 | -0.09 | -0.2 | -0.73 | -0.51 |
| NM_026949.2 | CCR4-NOT transcription complex, subunit 8 | 0.99 | -0.3 | -0.55 | -0.63 |
| NM_007684.2 | Centrin 3 | -0.19 | 0.03 | -0.55 | -0.61 |
| NM_001033175.1 | Ceroid-lipofuscinosis, neuronal 6 | 0.06 | 0.24 | -0.88 | -1.36 |
| NM_147778.2 | COMM domain containing 3 | 0.06 | -0.23 | -0.86 | -0.8 |
| NM_172974.1 | COP9 (constitutive photomorphogenic) homolog, subunit 7b (Arabidopsis thaliana) | 0.45 | 0.01 | -0.66 | -0.13 |
| NM_022309.2 | Core binding factor beta | 0.21 | -0.29 | -1.13 | -0.86 |
| NM_009829.3 | Cyclin D2 | 0.01 | -0.07 | -0.71 | -0.57 |
| NM_009941.1 | Cytochrome c oxidase subunit IV isoform 1 | -0.04 | -0.03 | -0.56 | 0.05 |
| NM_009895.2 | Cytokine inducible SH2-containing protein | 0.79 | 0.25 | -0.64 | -0.25 |
| NM_007826.2 | Dachshund 1 (Drosophila) | 0.3 | -0.18 | -1.33 | -0.48 |
| NM_007843.2 | Defensin beta 1 | -0.47 | -0.2 | -1.91 | -2.13 |
| AK016565.1 | Dual-specificity tyrosine-(Y)-phosphorylation regulated kinase 2 | 0.16 | -0.01 | -1.45 | -1.02 |
| NM_010064.1 | Dynein cytoplasmic 1 intermediate chain 2 | 0.05 | 0.28 | -0.49 | -0.54 |
|  | EST | 0.11 | 0.35 | -0.37 | -0.68 |
|  | EST | 0.2 | 0.43 | -0.62 | -1.13 |
| BY079945.1 | Expressed sequence AU022875 | 0.46 | 0.09 | -0.43 | -0.48 |
| NM_001033189.1 | Expressed sequence C77080 | 0.36 | -0.43 | -1.76 | -0.88 |
| NM_010191.2 | Farnesyl diphosphate farnesyl transferase 1 | 0.25 | 0.13 | -0.63 | -0.79 |
| NM_008054.1 | Fyn proto-oncogene | 0.14 | -0.05 | -0.71 | -1.02 |
| NM_010299.2 | GM2 ganglioside activator protein | 0.42 | 0.02 | -0.21 | -0.4 |
| NM_010415.1 | Heparin-binding EGF-like growth factor | -0.14 | -0.57 | -1.74 | -1.12 |
| NM_144919.1 | Histone deacetylase 11 | 0.25 | 0.06 | -1.16 | -1.13 |
| NM_015755.1 | Hormonally upregulated Neu-associated kinase | 0.14 | 0.13 | -0.94 | -0.44 |
| NM_019657.2 | Hydroxysteroid (17-beta) dehydrogenase 12 | 0.03 | -0.06 | -0.46 | -0.79 |
| NM_173011.1 | Isocitrate dehydrogenase 2 (NADP+), mitochondrial | 0.14 | -0.05 | -1 | -0.84 |
| 75785 (EG) | Kelch-like 24 (Drosophila) | -0.1 | 0.19 | -1.17 | -1.66 |
| NM_008212.1 | L-3-hydroxyacyl-Coenzyme A dehydrogenase, short chain | 0.03 | -0.68 | -1.22 | -1.31 |
| NM_145503.1 | Leucine zipper, putative tumor suppressor 2 | -0.08 | -0.4 | -2.21 | -1.78 |
| NM_010700.1 | Low density lipoprotein receptor | 0.31 | -0.01 | -1.43 | -1.25 |
| NM_027309.1 | LysM, putative peptidoglycan-binding, domain containing 2 | 0.05 | -0.17 | -1.22 | -1.01 |
| NM_010771.3 | Matrin 3 | 0.07 | -0.09 | -0.91 | -0.86 |
| NM_010753.2 | Max dimerization protein 4 | -0.37 | 0.04 | -0.73 | -0.87 |
| NM_008630.1 | Metallothionein 2 | 0.2 | -0.39 | -1.23 | -0.73 |
| NM_020007.2 | Muscleblind-like 1 (Drosophila) | 0.16 | 0.21 | -1 | -0.53 |
| NM_027326.2 | Myeloid/lymphoid or mixed lineage-leukemia translocation to 3 homolog (Drosophila) | 0.34 | 0.08 | -0.67 | -0.7 |
| 59125 (EG) | NIMA (never in mitosis gene a)-related expressed kinase 7 | 0.02 | 0.1 | -0.59 | -1.09 |
| NM_011630.1 | Nuclear receptor subfamily 2, group C, member 2 | 0.94 | -0.04 | -0.81 | -0.66 |
| NM_015781.2 | Nucleosome assembly protein 1-like 1 | 0.14 | -0.02 | -0.67 | -0.52 |
| NM_029404.1 | PHD finger protein 14 | 0.32 | 0.39 | 0.06 | -0.17 |
| NM_028994.1 | Phosphoenolpyruvate carboxykinase 2 (mitochondrial) | 0.05 | -0.31 | -0.56 | -0.66 |
| NM_008808.2 | Platelet derived growth factor, alpha | 0.28 | 0.04 | -1.1 | -1.15 |
| NM_148927.1 | Pleckstrin homology domain containing, family A (phosphoinositide binding specific) member 4 | 0.09 | -0.41 | -0.7 | -0.97 |
| NM_026420.1 | Polyadenylate-binding protein-interacting protein 2 | 0.35 | 0.11 | -0.47 | -0.19 |
| NM_198600.1 | Polymerase (DNA directed) sigma | 0.11 | -0.51 | -0.69 | -0.48 |
| NM_025823.3 | Prenylcysteine oxidase 1 | 0.3 | -0.07 | -0.63 | -0.49 |
| NM_001033225.1 | Proline-rich nuclear receptor coactivator 1 | -0.33 | 0.84 | -0.87 | -1.15 |
| NM_172665.1 | Pyruvate dehydrogenase kinase, isoenzyme 1 | -0.02 | 0.13 | -0.56 | -0.99 |
| NM_024448.2 | RAB12, member RAS oncogene family | 0.08 | -0.24 | -0.54 | -0.81 |
| NM_009009.2 | RAD21 homolog (S. pombe) | -0.08 | -0.13 | -0.99 | -1 |
| NM_153194.1 | RIKEN cDNA 1110034O07 gene | 0.08 | -0.01 | -0.53 | -0.65 |
| NM_026388.2 | RIKEN cDNA 1200015A19 gene | 0.17 | 0.05 | -0.44 | -0.62 |
| NM_001040396.1 | RIKEN cDNA 2810407C02 gene | 0.19 | -0.09 | -0.56 | -0.79 |
| NM_178141.1 | RIKEN cDNA 3830406C13 gene | 0.02 | 0.26 | -0.89 | -0.44 |
| NM_001003948.1 | RIKEN cDNA 5033414K04 gene | 0.14 | 0.16 | -1.08 | -1.22 |
| 26374 (EG) | Ring finger and WD repeat domain 2 | 0.25 | 0.09 | -0.24 | -0.15 |
| NM_172718.1 | RUN and TBC1 domain containing 2 | 0.24 | -0.02 | -0.37 | -0.52 |
| NM_009255.2 | Serine (or cysteine) peptidase inhibitor, clade E, member 2 | 0.16 | 0.31 | -0.52 | -0.66 |
| NM_001013370.1 | Sestrin 1 | 0.31 | -0.42 | -1.1 | -0.42 |
| NM_019989.2 | SH3-binding domain glutamic acid-rich protein like | 0.29 | 0.18 | -0.31 | -0.42 |
| NM_133816.1 | SH3-domain binding protein 4 | -0.14 | 0.2 | -0.96 | -0.68 |
| NM_019929.1 | SMT3 suppressor of mif two 3 homolog 3 (yeast) | 0.02 | -0.28 | -0.79 | -0.9 |
| NM_019929.1 | SMT3 suppressor of mif two 3 homolog 3 (yeast) | 0.19 | -0.26 | -0.76 | -0.69 |
| NM_031197.1 | Solute carrier family 2 (facilitated glucose transporter), member 2 | 0.3 | 0.29 | -1.16 | -1.04 |
| NM_011399.1 | Solute carrier family 25 (mitochondrial carrier, peroxisomal  membrane protein), member 17 | 0.08 | 0.11 | -0.64 | -0.46 |
| NM_011895.2 | Solute carrier family 35 (CMP-sialic acid transporter), member 1 | -0.18 | -0.35 | -0.65 | -0.33 |
| NM_016917.1 | Solute carrier family 40 (iron-regulated transporter), member 1 | 0.26 | -0.32 | -1.34 | -1.4 |
| NM_016917.1 | Solute carrier family 40 (iron-regulated transporter), member 1 | 0.48 | -0.34 | -1.66 | -1.25 |
| NM_009128.1 | Stearoyl-Coenzyme A desaturase 1 | -0.32 | -0.4 | -1.97 | -1.62 |
| NM_009128.1 | Stearoyl-Coenzyme A desaturase 1 | -0.36 | -0.45 | -1.62 | -1.33 |
| NM_153153.1 | Supervillin | 0.03 | -0.15 | -1.86 | -2.03 |
| NM_153153.1 | Supervillin | -0.25 | -0.67 | -1.88 | -1.38 |
| NM_011416.2 | SWI/SNF related, matrix associated, actin dependent regulator of  chromatin, subfamily a, member 2 | -0.07 | 0.05 | -0.49 | -0.51 |
| NM_022030.2 | Synaptic vesicle glycoprotein 2 a | 0.03 | 0.09 | -0.52 | -0.7 |
| NM_008304.1 | Syndecan 2 | -0.33 | -0.22 | -0.73 | -1.01 |
| NM_145476.2 | TBC1 domain family, member 22a | 0.15 | 0.07 | -0.77 | -0.68 |
| CA568079.1 | Tensin 3 | 0.17 | -0.11 | -1.13 | -0.94 |
| NM_178357.1 | TGFB inducible early growth response 3 | 0.21 | -0.57 | -1.86 | -1.54 |
| NM_023719.1 | Thioredoxin interacting protein | -0.27 | -2.88 | -3.06 | -2.92 |
| NM_011605.1 | Thymopoietin | 0.02 | -0.24 | -0.92 | -0.47 |
| NM_017376.2 | Thyrotroph embryonic factor | -0.05 | -0.1 | -0.59 | -0.97 |
|  | Transcribed locus | -0.4 | -0.73 | -1.97 | -2.08 |
|  | Transcribed locus | 0.34 | 0.14 | -1.42 | -2.04 |
| C80148.1 | Transcribed locus | 0.15 | -0.04 | -0.92 | -1.4 |
| NM_028097.2 | Transmembrane protein 68 | 0.29 | 0.15 | -0.46 | -0.5 |
| NM_207652.1 | TSC22 domain family, member 1 | -0.03 | -0.06 | -1.7 | -1.66 |
| NM_013814.2 | UDP-N-acetyl-alpha-D-galactosamine:polypeptide  N-acetylgalactosaminyltransferase 1 | 0.01 | 0.13 | -0.41 | -0.4 |
| NM_027166.3 | Yippee-like 5 (Drosophila) | -0.26 | -0.26 | -1.02 | -1.21 |
| NM_027166.3 | Yippee-like 5 (Drosophila) | -0.23 | -0.3 | -1.46 | -1.37 |
| NM_178404.2 | Zinc finger CCCH type containing 6 | 0.24 | -0.04 | -1.19 | -1.38 |
| NM_001001806.2 | Zinc finger protein 36, C3H type-like 2 | 0.24 | 1 | -0.42 | -0.33 |
| NM_001024846.1 | Zinc finger protein 62 | -0.2 | -0.11 | -0.68 | -0.7 |
| NM_175433.4 | Zinc finger protein 710 | 0.46 | 0.13 | -0.57 | -0.84 |
| NM_028031.1 | Zinc finger, DHHC domain containing 13 | 0.17 | -0.04 | -0.89 | -0.71 |
|  |  |  |  |  |  |
| **CLUSTER E** |  |  |  |  |  |
|  |  |  |  |  |  |
| NM_016966.3 | 3-phosphoglycerate dehydrogenase | 0.36 | 0.19 | 0.04 | -0.49 |
| 236539 (EG) | 3-phosphoglycerate dehydrogenase | 0.11 | 0.02 | 0.26 | -0.56 |
| NM_029810.2 | 5'-nucleotidase, cytosolic II | 0.16 | 0.23 | -0.44 | -0.87 |
| NM_007393.1 | Actin, beta, cytoplasmic | 0.1 | -0.01 | -0.09 | -0.66 |
| NM_001008533.2 | Adenosine A1 receptor | 0.16 | 0.36 | 0.21 | -1 |
| NM_181404.5 | Ankyrin repeat domain 15 | 0.36 | -0.02 | 0.64 | -0.39 |
| NM_009687.1 | Apurinic/apyrimidinic endonuclease 1 | 0.32 | 0.04 | -0.31 | -0.71 |
| NM_009663.1 | Arachidonate 5-lipoxygenase activating protein | 0.4 | -0.2 | -0.39 | -1.1 |
| NM_170755.1 | CDNA sequence BC038286 | 0.25 | -0.02 | -0.22 | -0.58 |
| NM_153803.1 | CDNA sequence BC038479 | -0.02 | -0.1 | -1.28 | -2.25 |
|  | CDNA, clone:Y0G0135G01 | 0.04 | 0 | -0.42 | -0.97 |
| NM_144811.2 | Chromobox homolog 7 | -0.01 | -0.31 | -0.48 | -0.99 |
| NM_026070.1 | Coiled-coil domain containing 53 | 0.18 | 0.09 | -0.33 | -0.85 |
| NM_007755.1 | Cytoplasmic polyadenylation element binding protein 1 | 0.18 | 0.17 | 0.31 | -0.22 |
| NM_001037937.1 | DEP domain containing 6 | 0.36 | 0.06 | 0.41 | -0.44 |
| NM_007890.1 | Dual-specificity tyrosine-(Y)-phosphorylation regulated kinase 1a | 0.1 | 0.18 | 0.14 | -0.2 |
| NM_010330.2 | Embigin | 0.2 | 0.04 | 0.25 | -0.48 |
|  | EST | 0.41 | -0.16 | -0.58 | -1.15 |
| NM_025344.1 | Eukaryotic translation initiation factor 3, subunit 5 (epsilon) | 0.47 | -0.07 | 0 | -0.24 |
| NM_007918.2 | Eukaryotic translation initiation factor 4E binding protein 1 | -0.05 | 0.02 | 0.52 | -0.95 |
| NM_009148.2 | Exocyst complex component 4 | 0.26 | 0.2 | -0.16 | -0.78 |
| NM_134082.2 | FERM, RhoGEF (Arhgef) and pleckstrin domain protein 1 (chondrocyte-derived) | 0.62 | 0.12 | -0.08 | -0.46 |
| NM_019650.2 | Golgi SNAP receptor complex member 2 | 0.05 | -0.18 | -0.4 | -0.74 |
| NM_010412.2 | Histone deacetylase 5 | 0.12 | -0.34 | -0.7 | -2.37 |
| NM_010500.1 | Immediate early response 5 | 0.11 | -0.5 | -0.36 | -1.15 |
| NM_026859.2 | MAF1 homolog (S. cerevisiae) | -0.03 | -0.03 | -0.03 | -0.81 |
| NM_001003913.1 | Methionine-tRNA synthetase | 0.15 | 0.13 | -0.34 | -0.76 |
| BC036286.1 | Myeloid/lymphoid or mixed-lineage leukemia 5 | 0.13 | -0.05 | -0.34 | -0.74 |
| NM_019738.1 | Nuclear protein 1 | 0.05 | 0.12 | -0.52 | -0.97 |
| NM_026018.1 | PDZK1 interacting protein 1 | 0.08 | -0.03 | -0.99 | -2.16 |
| NM_144806.1 | Phosphoribosyl pyrophosphate synthetase-associated protein 2 | -0.03 | 0.12 | -0.55 | -0.99 |
| NM_024288.1 | Required for meiotic nuclear division 5 homolog A (S. cerevisiae) | 0.06 | 0.06 | -0.5 | -0.96 |
| NM_027279.2 | RIKEN cDNA 2810422O20 gene | 0.22 | -1.11 | -0.45 | -0.39 |
| NM_175514.1 | RIKEN cDNA D430039N05 gene | 0.07 | -0.02 | -0.35 | -0.89 |
| NM_009155.2 | Selenoprotein P, plasma, 1 | 0.1 | -0.2 | -0.59 | -1.4 |
| NM_016799.1 | Serine/arginine repetitive matrix 1 | 0.44 | 0.23 | 0.26 | -0.34 |
| NM_019535.2 | SH3-domain GRB2-like 2 | 0 | 0.19 | -0.75 | -1.53 |
| NM_138756.2 | Solute carrier family 25, member 36 | 0.06 | 0.15 | -0.17 | -0.52 |
| NM_133891.2 | Solute carrier family 44, member 1 | 0.15 | -0.21 | -0.3 | -1.02 |
| NM_025436.1 | Sterol-C4-methyl oxidase-like | 0.43 | 0.11 | -0.5 | -1.13 |
| NM_145476.2 | TBC1 domain family, member 22a | 0.1 | -0.08 | 0 | -0.47 |
| 71817 (EG) | Transmembrane protein 50A | 0 | -0.07 | -0.47 | -1.02 |
| NM_023053.1 | Twisted gastrulation homolog 1 (Drosophila) | 0.28 | 0.02 | -0.02 | -0.96 |
| NM_009377.1 | Tyrosine hydroxylase | 0.12 | -0.07 | -0.36 | -1.23 |
| NM_009469.3 | Unc-51 like kinase 1 (C. elegans) | -0.25 | 0.42 | -0.32 | -0.87 |
| NM_021284.3 | V-Ki-ras2 Kirsten rat sarcoma viral oncogene homolog | -0.1 | 0.07 | -0.46 | -1.14 |
| NM_021284.3 | V-Ki-ras2 Kirsten rat sarcoma viral oncogene homolog | -0.02 | -0.26 | -0.45 | -1.15 |
| NM_026137.2 | WD repeat domain 13 | 0.07 | -0.04 | -0.34 | -0.77 |
| NM_178395.2 | Zinc finger, DHHC domain containing 2 | -0.2 | -0.33 | -0.59 | -1.59 |

Growth-arrested TC-Tet cells were treated or not with 100 nM GLP-1 during 45 min, 3 and 7 h. Gene expression was analyzed by cDNA microarray. Gene selection from microarray data was performed using an ANOVA F-test with a p-value cutoff of 0.05.
